# Supplementary material for: Feasibility of a mobility programme for people with dementia in the respite care setting: results of the DESKK study
Source: Springer Nature journal article supplement (doi:10.1186/s12877-020-01728-z), 2020-09-07
Supplement: MOESM1 [file 18355004]

## Interview Guide for Individual and Group Interviews - Process Evaluation DESKK

| <p><b><u>Theme structures</u></b><br/><b><u>(control questions)</u></b></p>                                                                                                               | <p><b><u>Interview Sub-Topics</u></b></p>                                                                                                                                                             | <p><b><u>Content checklist</u></b></p> <p><b>Please ask at Follow-Up in each case:</b><br/>Changes from the last interview?<br/>Reasons?</p>                                                                                                                                    |
|-------------------------------------------------------------------------------------------------------------------------------------------------------------------------------------------|-------------------------------------------------------------------------------------------------------------------------------------------------------------------------------------------------------|---------------------------------------------------------------------------------------------------------------------------------------------------------------------------------------------------------------------------------------------------------------------------------|
| <p><b>Outer Setting - Patient Needs &amp; Resources</b></p> <p>(What is known about the needs and resources that the target group must have in order to implement the intervention? )</p> | <p>To what extent did the programme components meet the wishes and subjective needs of the target group?</p>                                                                                          | <ul style="list-style-type: none"> <li>- Necessary requirements, which PwD and relatives have to bring along</li> <li>- Over- or underchallenging factors (barriers/obstacles)</li> <li>- To what extent were the preferences of relatives/PwD considered?</li> </ul>           |
| <p><b>Outer Setting - Cosmopolitanism</b></p> <p>(How does the networking of the RC centers look like to the outside world?)</p>                                                          | <p>Networking between health care providers inside and outside the RC center</p> <p>Networking between mobility providers inside and outside the RC center</p> <p>Networking with other providers</p> | <ul style="list-style-type: none"> <li>- Which providers internally (which offers)</li> <li>- Which external providers (which offers)</li> <li>- What are the contents of the exchange</li> <li>- How does exchange take place</li> <li>- On which (personnel) level</li> </ul> |

|                                                                                                                                                                                      |                                                                                                                                  |                                                                                                                                                                                                                                                                                                                                                                    |
|--------------------------------------------------------------------------------------------------------------------------------------------------------------------------------------|----------------------------------------------------------------------------------------------------------------------------------|--------------------------------------------------------------------------------------------------------------------------------------------------------------------------------------------------------------------------------------------------------------------------------------------------------------------------------------------------------------------|
| <p><b>Intervention Characteristics - Complexity</b></p> <p>(How difficult is the intervention; how long will it last; how extensive/multifaceted is it; what steps are required)</p> | <p>Complexity of the Mobility programme</p>                                                                                      | <ul style="list-style-type: none"> <li>- Implementation of assessments</li> <li>- Structuring of the program</li> <li>- Documentation</li> <li>- Homework programme (structuring + instructions for relatives)</li> <li>- Implementation of assessments</li> <li>- Structuring of the program</li> <li>- Documentation/ - Logging</li> <li>- Monitoring</li> </ul> |
| <p><b>Intervention Characteristics - Adaptability</b></p> <p>(Is the intervention adaptable to the target group?)</p>                                                                | <p>Adaptability of the programme to PwD</p>                                                                                      | <ul style="list-style-type: none"> <li>- Adaptation to functional status PwD (selection of exercises with reference to the level of difficulty indicated)</li> <li>- Adaptation to preferences PwD</li> <li>- Documentation of the adjustments</li> <li>- Adaptation to the needs and requirements of the Relatives</li> </ul>                                     |
| <p><b>Intervention Characteristics - Design Quality and Packaging</b></p> <p>(Structure and presentation of documents/materials used within the programme)</p>                       | <p>To what extent are the manuals, instruments and illustrations (e.g. the DESKK poster) adequately designed and structured?</p> | <ul style="list-style-type: none"> <li>- DESKK print documents</li> <li>- DESKK Homepage</li> <li>- Training map</li> </ul>                                                                                                                                                                                                                                        |

|                                                                                                                                                                                                                           |                                                                                                                                            |                                                                                                                                                                                                                                                             |
|---------------------------------------------------------------------------------------------------------------------------------------------------------------------------------------------------------------------------|--------------------------------------------------------------------------------------------------------------------------------------------|-------------------------------------------------------------------------------------------------------------------------------------------------------------------------------------------------------------------------------------------------------------|
| <p><b>Intervention Characteristics - Relative Advantage</b></p> <p>(What are the advantages and disadvantages of the short-term care concept compared to the previous care situation?)</p>                                | <p>Reflection of the status prior to the short-term care concept</p>                                                                       | <ul style="list-style-type: none"> <li>- Effects on PwD</li> <li>- Effects on personal work as carer</li> </ul>                                                                                                                                             |
| <p><b>Inner Setting - Access to information</b></p> <p>(Are the individual intervention steps ordered in terms of time, personnel and structure?)</p>                                                                     | <p>Perception of the planning processes</p> <p>Perception of the institution's internal communication</p>                                  | <ul style="list-style-type: none"> <li>- Hierarchy Structures (Control)</li> <li>- defined responsibilities</li> <li>- Planning tools?</li> <li>- Processes for arrangements with superiors and colleagues</li> <li>- Quality circle or similar?</li> </ul> |
| <p><b>Inner Setting - Structural Characteristics</b></p> <p>(How is the RC center structured - special features, transferability)</p>                                                                                     | <p>Structure of the RC center</p>                                                                                                          | <ul style="list-style-type: none"> <li>- structures actually available in the RC centre for programme implementation</li> </ul>                                                                                                                             |
| <p><b>Inner Setting - Readiness for implementation</b></p> <p>(Are (project) objectives clearly communicated, is the achievement of objectives pursued and is the status of the achievement of objectives monitored?)</p> | <p>Communication of the project goals (also regarding implementation)</p> <p>Integration into the programme structures</p> <p>Feedback</p> | <ul style="list-style-type: none"> <li>- Exchange meetings (type, scope)</li> <li>- Information coordinators?</li> <li>- Evaluation processes</li> </ul>                                                                                                    |

|                                                                                                                                                                                                                    |                                                                                            |                                                                                                                                                                                                                                                                                                                                                                                            |
|--------------------------------------------------------------------------------------------------------------------------------------------------------------------------------------------------------------------|--------------------------------------------------------------------------------------------|--------------------------------------------------------------------------------------------------------------------------------------------------------------------------------------------------------------------------------------------------------------------------------------------------------------------------------------------------------------------------------------------|
| <p><b>Inner Setting - Available Resources</b></p> <p>(Are personnel, material and time resources sufficiently available to adequately carry out the project?)</p>                                                  | <p>Time aspects</p> <p>Material</p> <p>Skills</p>                                          | <ul style="list-style-type: none"> <li>- Assessments</li> <li>- Preparation</li> <li>- Implementation</li> <li>- Homework programme</li> </ul>                                                                                                                                                                                                                                             |
| <p><b>Inner Setting - Access to information</b></p> <p>(Is information about the purpose and procedure of the intervention clearly described?)</p>                                                                 | <p>Staff training</p> <p>Manual</p> <p>Feedback within the scope of process evaluation</p> | <ul style="list-style-type: none"> <li>- adequate explanations in the training courses?</li> <li>- sufficient depth of content - Contact person? <ul style="list-style-type: none"> <li>• Comprehensibility</li> <li>• Structure (simplicity)</li> <li>• adequate explanation and Feedback</li> </ul> </li> <li>- are selection of contents and queries meaningful and helpful?</li> </ul> |
| <p><b>Characteristics of Individuals</b></p> <p><b>- Knowledge &amp; Beliefs about the Intervention</b></p> <p>(Which attitudes and values do the employees and relatives have towards the RC center concept?)</p> | <p>Project goals</p> <p>Project implementation</p> <p>Results</p>                          | <ul style="list-style-type: none"> <li>- Assessment of the realism of the objectives</li> <li>- satisfactory resource-benefit ratio</li> <li>- Effects on the own nursing activity (e.g. perceived competence or excessive demands)</li> <li>- Transferability to other Care facilities</li> </ul>                                                                                         |

|                                                                                                                                                                                       |                                                                                      |                                                                                                                                                                                                  |
|---------------------------------------------------------------------------------------------------------------------------------------------------------------------------------------|--------------------------------------------------------------------------------------|--------------------------------------------------------------------------------------------------------------------------------------------------------------------------------------------------|
| <p><b>Process - Reflecting &amp; Evaluating</b></p> <p>(How was it done, what was realised, how was its effectiveness, what would have to be handled differently in the future? )</p> | <p>Reflected process description and (interim) conclusion on process application</p> | <p>- Evaluation processes regarding the Implementation</p> <ul style="list-style-type: none"><li>• what worked, what didn't?</li><li>• resulting change processes</li><li>• used tools</li></ul> |
|---------------------------------------------------------------------------------------------------------------------------------------------------------------------------------------|--------------------------------------------------------------------------------------|--------------------------------------------------------------------------------------------------------------------------------------------------------------------------------------------------|
